# Supplementary material for: A novel coumarin-chitosan fluorescent hydrogel for the selective identification of Fe2+in aqueous systems
Source: Royal Society of Chemistry journal article supplement (doi:10.1039/d0py00802h), 2020-01-01
Supplement: d0py00802h1.pdf [file d0py00802h1.pdf]

**Novel coumarin-chitosan fluorescent hydrogel for selective  
identification of Fe<sup>2+</sup> in aqueous system**

Shuangyu Xiong<sup>a</sup>, Lian Duan<sup>b</sup>, and Xinjian Cheng<sup>a\*</sup>

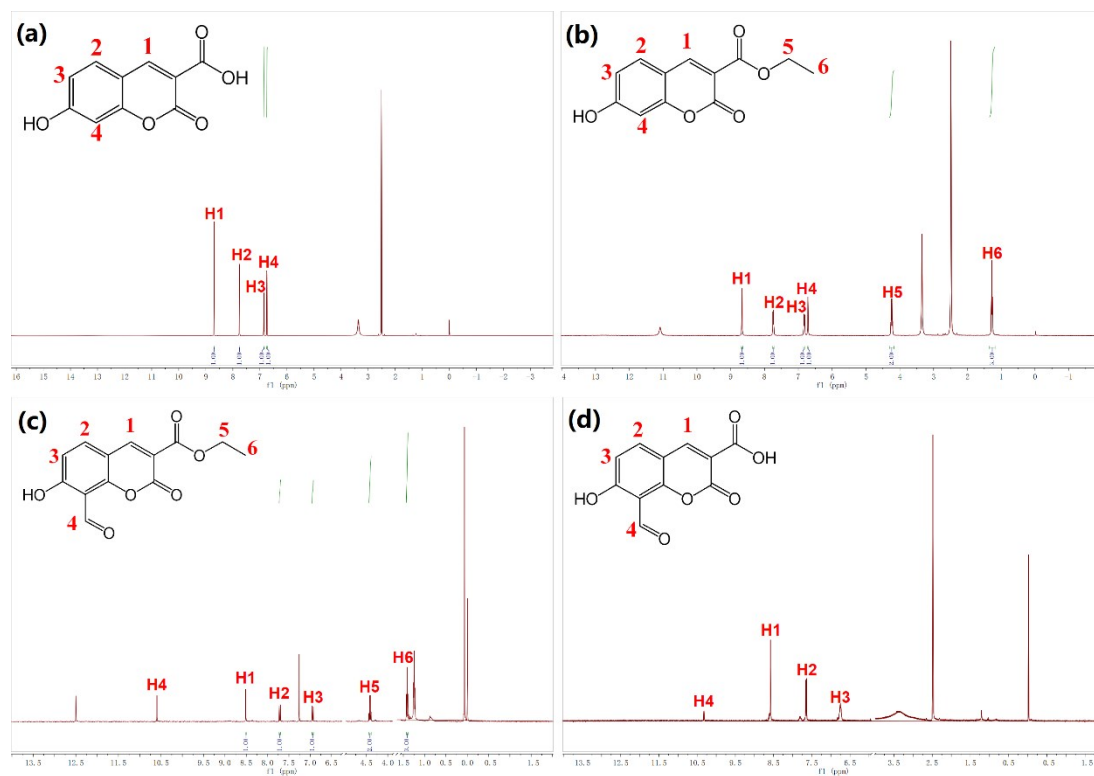

Figure S1  $^1\text{H}$  NMR spectra of (a) CA, (b) CB, (c) CO and (d) CAO.

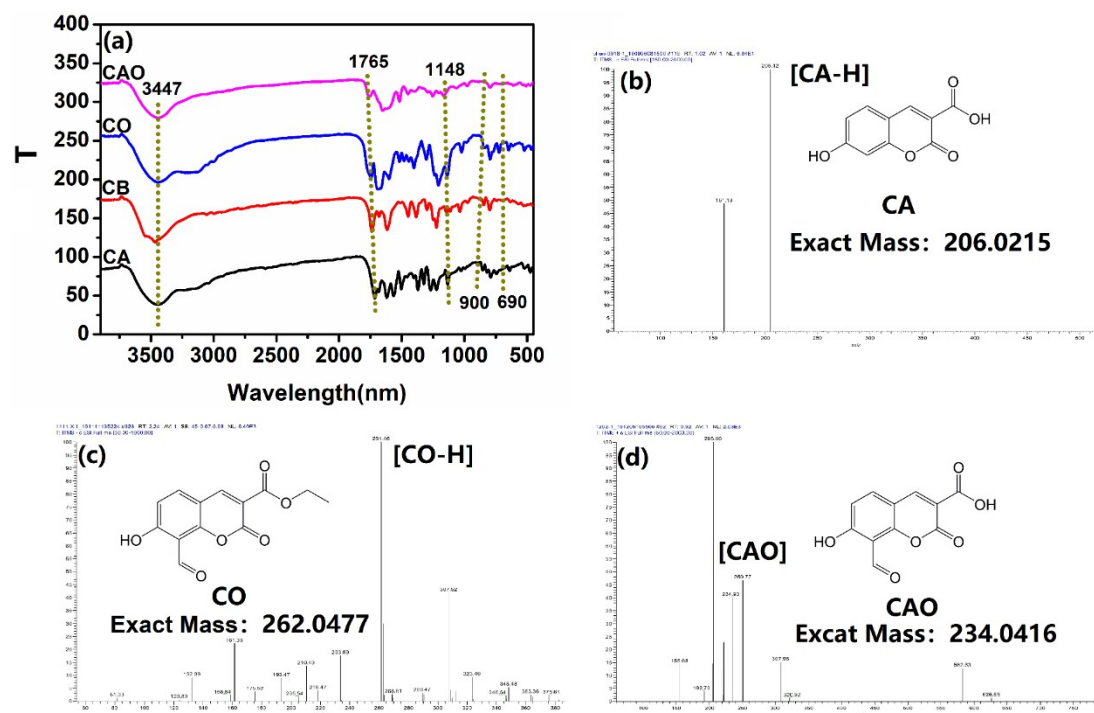

Figure S2 (a) FTIR spectra of CA, CB, CO and CAO. HR-MS spectra of (b) CA, (c) CO and (d) CAO.

Table S1. The content of elemental components in fluorescent hydrogels by XPS.

| Elements | Atomic % |       |       |        |        |        |         |
|----------|----------|-------|-------|--------|--------|--------|---------|
|          | CA       | CA-CS | CO-CS | CAO-CS | CAS-CS | COS-CS | CAOS-CS |
| C        | 64.69    | 64.82 | 67.7  | 71.48  | 68.15  | 66.09  | 64.64   |
| N        | 6.52     | 5.39  | 5.09  | 3.97   | 2.76   | 2.63   | 2.44    |
| O        | 28.79    | 27.21 | 27.21 | 24.55  | 28.88  | 31.16  | 32.74   |
| S        | -        | -     | -     | -      | 0.22   | 0.11   | 0.18    |

Table S2. Distribution of XPS spectra for chitosan and chitosan hydrogels.

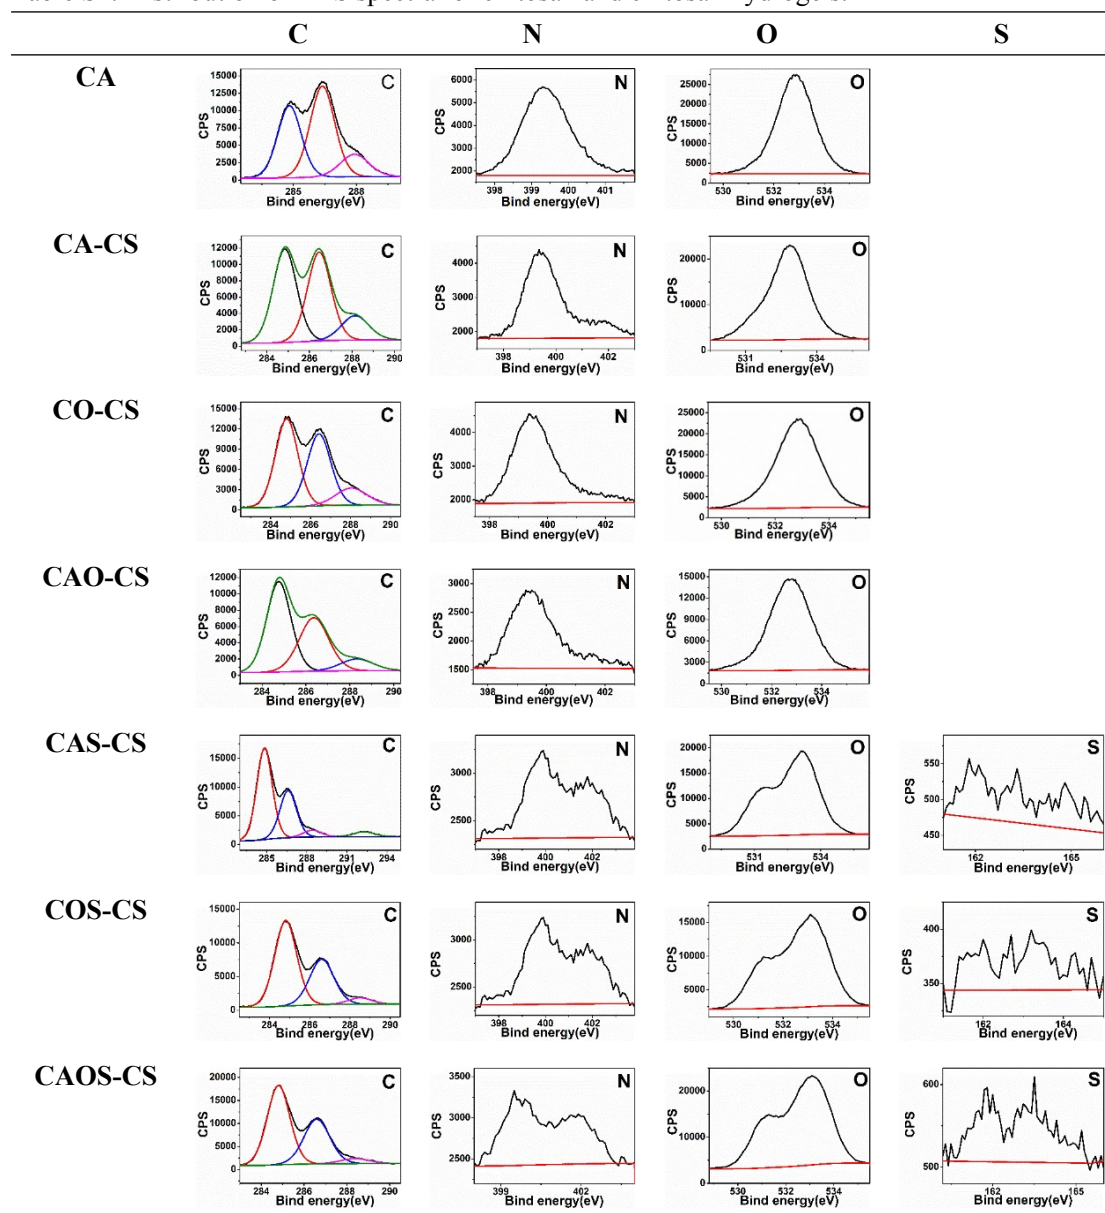

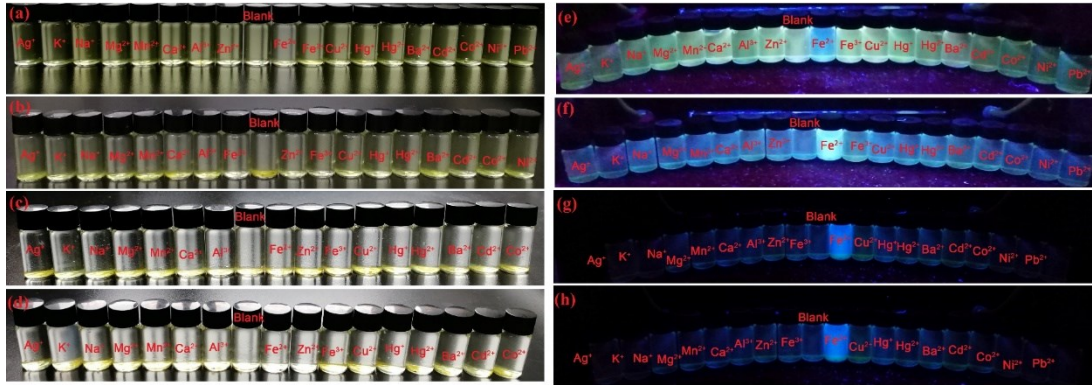

Figure S3 Photos of all sensors identifying metal ions from left to right (a) CO-CS under natural light, (a) CAO-CS under natural light, (a) COS-CS under natural light, (a) CAOS-CS under natural light, (a) CO-CS under fluorescence, (a) CAO-CS under fluorescence, (a) COS-CS under fluorescence and (a) CAOS-CS under fluorescence.

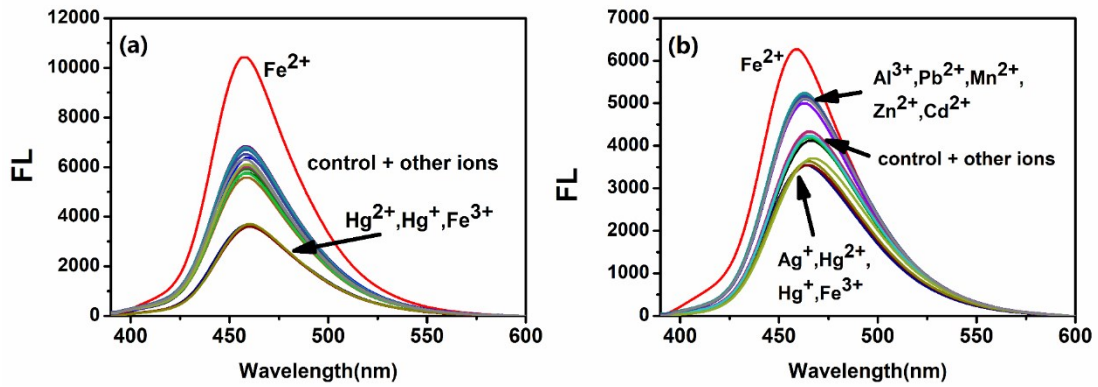

Figure S4 Fluorescence intensity change of (a) CA-CS and (b) CAS-CS ( $10^{-4}$  mol/L) in  $H_2O$  after addition of mental ions (2 equivalent of control).  $\lambda_{ex} = 360$  nm.

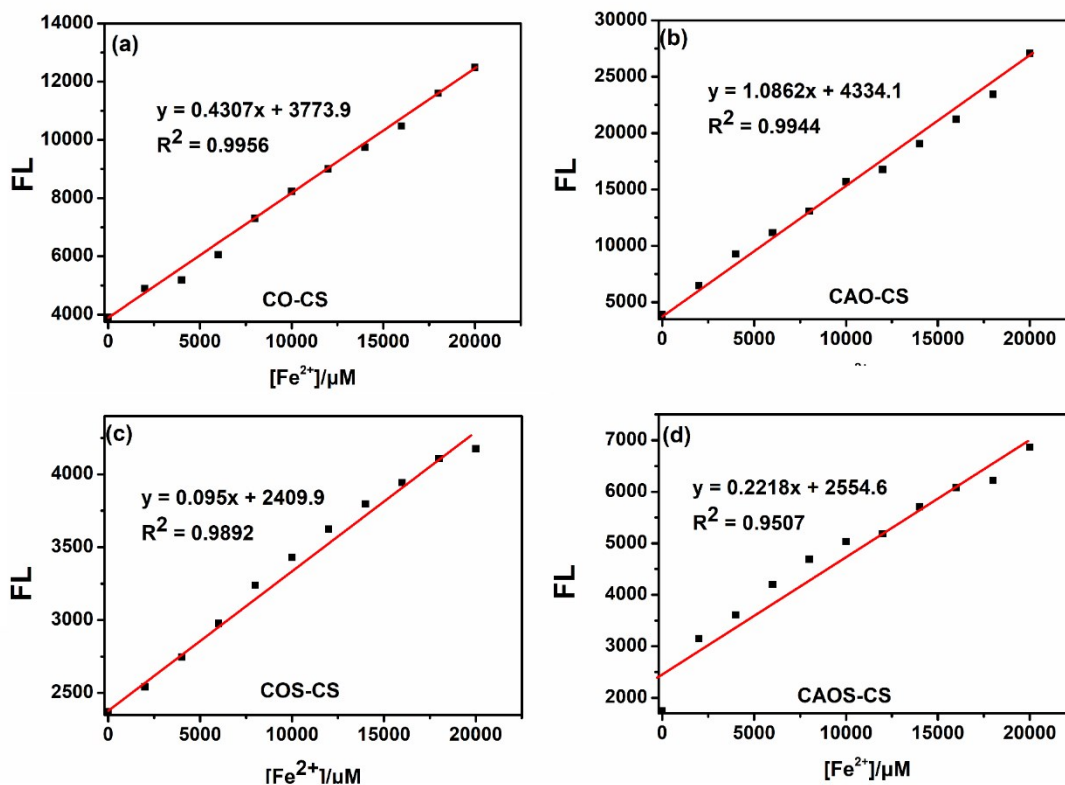

Figure S5 Standard curve of fluorescence titration of all sensors with  $Fe^{2+}$ . (a) CO-CS, (b) CAO-CS, (c) COS-CS and (d) CAOS-CS.

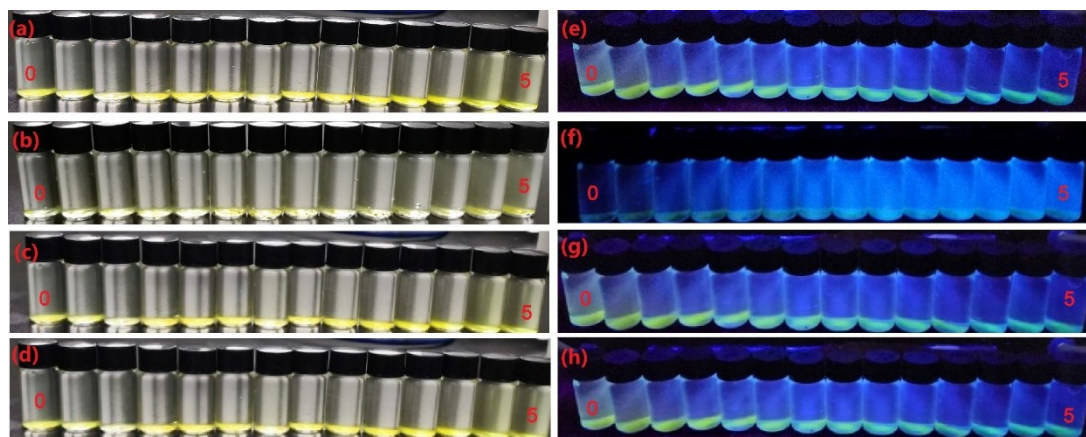

Figure S6 Photographs of macromolecular sensor for fluorescence titration of nitrophenol. (a) CO-CS with  $Fe^{2+}$  under natural light, (a) CAO-CS with  $Fe^{2+}$  under natural light, (a) COS-CS with  $Fe^{2+}$  under natural light, (a) CAOS-CS with  $Fe^{2+}$  under natural light, (a) CO-CS with  $Fe^{2+}$  under fluorescence, (a) CAO-CS with  $Fe^{2+}$  under fluorescence, (a) COS-CS with  $Fe^{2+}$  under fluorescence and (a) CAOS-CS with  $Fe^{2+}$  under fluorescence.

Table S3. Fluorescence quantum yield before and after the probe was combined with Fe<sup>2+</sup>.

| <b>Probes</b>  | <b><math>\Phi^a</math></b> | <b><math>\Phi^b</math></b> |
|----------------|----------------------------|----------------------------|
| <b>CO-CS</b>   | 0.06                       | 0.11                       |
| <b>CAO-CS</b>  | 0.09                       | 0.59                       |
| <b>COS-CS</b>  | 0.04                       | 0.05                       |
| <b>CAOS-CS</b> | 0.12                       | 0.18                       |

<sup>a</sup> before combining with Fe<sup>2+</sup>.

<sup>b</sup> after combining with Fe<sup>2+</sup>.
